# Supplementary material
Source: PubMed Central journal article supplement (PMC3399518)
Supplement: NIHMS363443-supplement-1_si_001.pdf [file NIHMS363443-supplement-1_si_001.pdf]

## Supporting Information

### Spectroscopic, Structural, and Theoretical Studies of Halide Complexes with a Urea-based Tripodal Receptor

Avijit Pramanik<sup>1</sup>, Douglas R. Powell<sup>2</sup>, Bryan M. Wong<sup>3</sup>, and Md. Alamgir Hossain\*<sup>1</sup>

<sup>1</sup>Department of Chemistry and Biochemistry, Jackson State University, Jackson, MS 39212,

<sup>2</sup>Department of Chemistry and Biochemistry, University of Oklahoma, Norman, OK 73019

<sup>3</sup>Materials Chemistry Department, Sandia National Laboratories, Livermore, CA 94551

Email: alamgir.hossain@jsums.edu

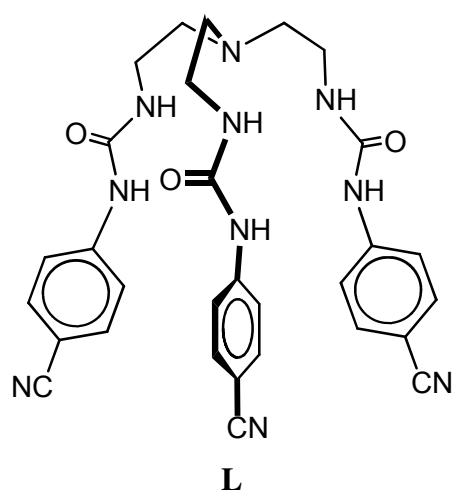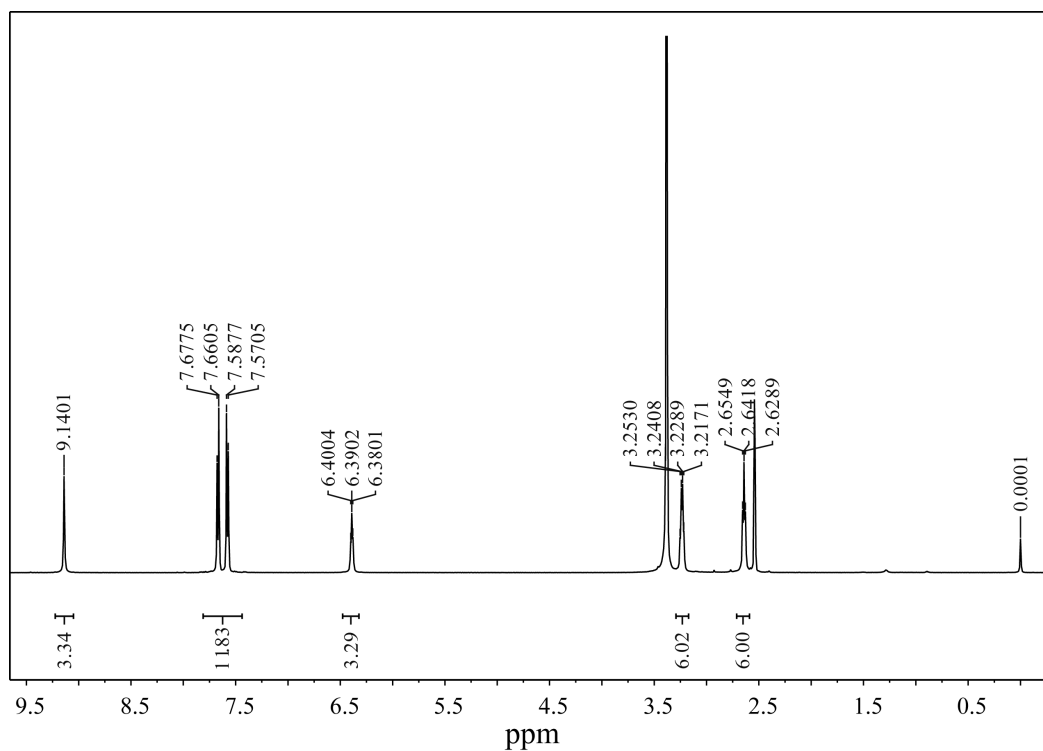

**Figure S1.** <sup>1</sup>H NMR spectrum of **L** in DMSO-*d*<sub>6</sub>.

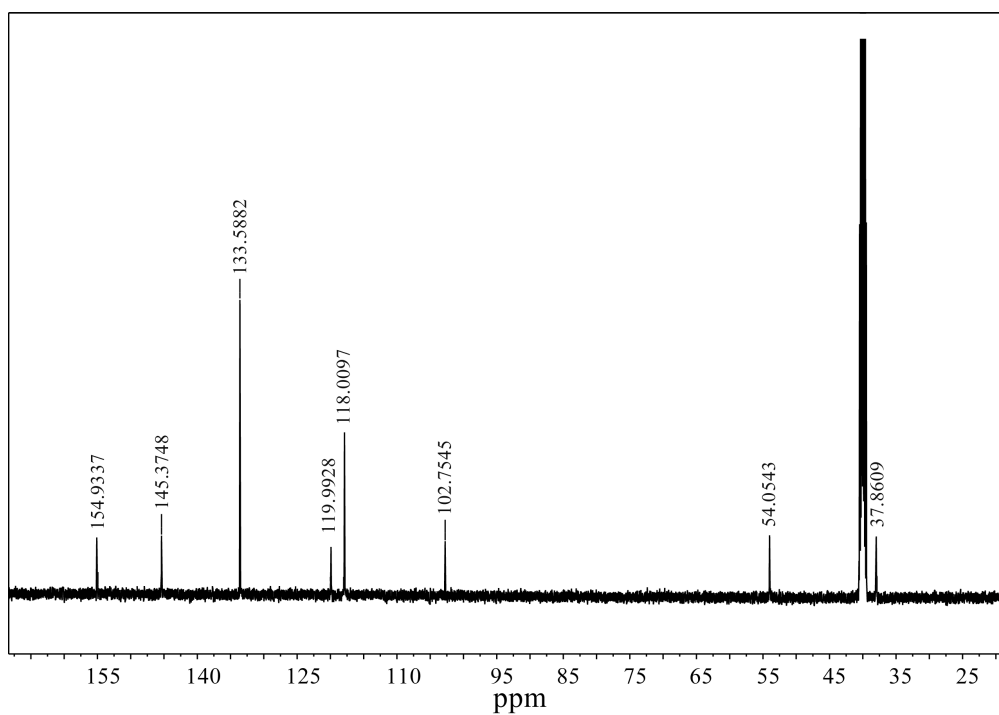

**Figure S2.**  $^{13}\text{C}$  NMR spectrum of **L** in  $\text{DMSO-}d_6$ .

tripodal urea\_cyano\_1 #1 RT: 0.02 AV: 1 NL: 1.45E7  
T: + c Full ms [215.00-1000.00]

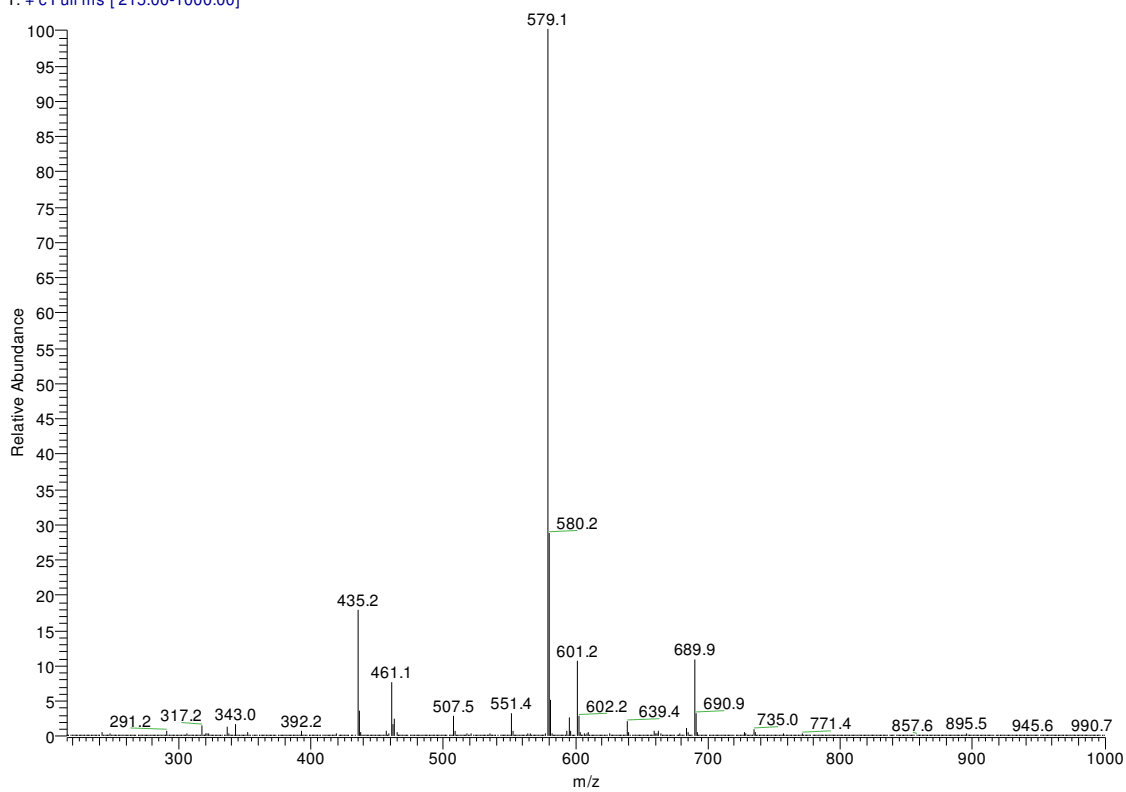

**Figure S3.** ESI-MS spectrum of ligand **L**

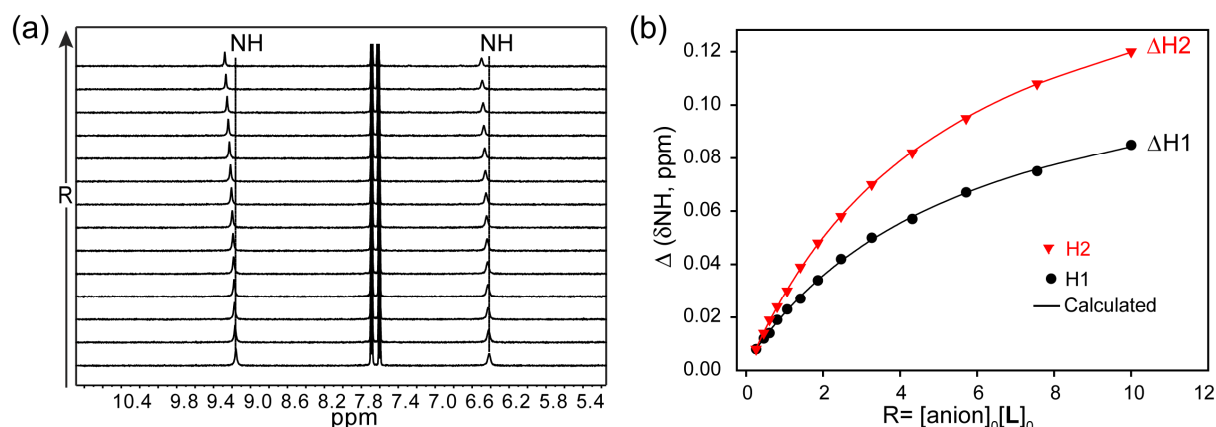

**Figure S4.** (a)  $^1\text{H}$  NMR spectra of **L** (2 mM) with an increasing amount of TBABr ( $R = [\text{TBABr}]_0/[\text{L}]_0$ ) in  $\text{DMSO-}d_6$ . (b) Titration curves of **L** with TBABr showing changes in the chemical shifts of NH are shown against an increasing amount of anions. H1 =  $\text{CH}_2\text{NHCO}$  and H2 =  $\text{CONHAr}$ .

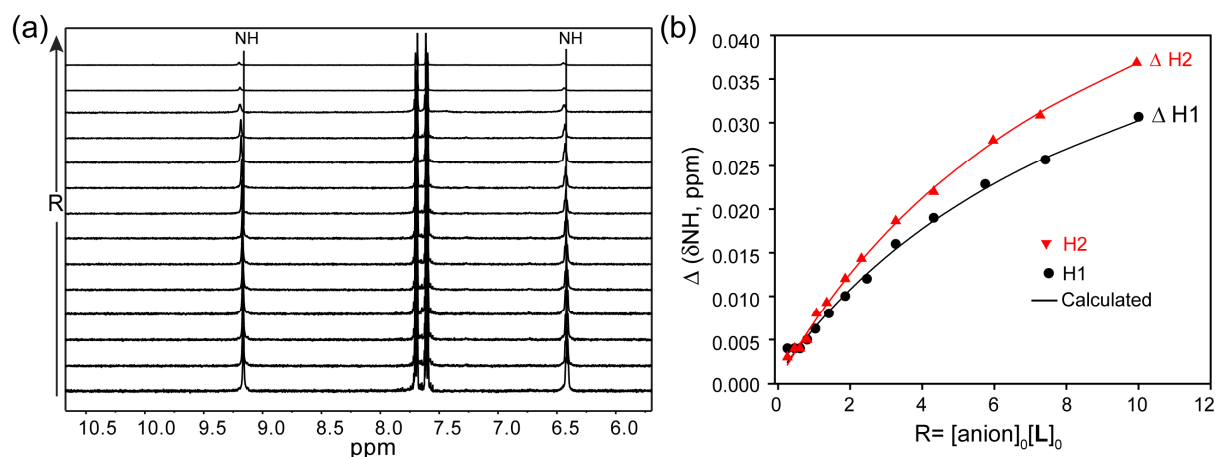

**Figure S5.**  $^1\text{H}$  NMR spectra of **L** (2mM) with an increasing amount of (a) TBAI ( $R = [\text{TBAI}]_0/[\text{L}]_0$ ) and (b) TBAI ( $R = [\text{TBAI}]_0/[\text{L}]_0$ ) in  $\text{DMSO-}d_6$ . (No apparent binding was observed from these titrations)

### Job plot

The binding stoichiometry was determined by a Job's plot analysis of the  $^1\text{H}$  NMR spectra of **L** with varying amounts of an anion in  $\text{DMSO-}d_6$ . Stock solutions (10 mM) of ligands and anion solution were prepared separately. Ten NMR samples were prepared with different proportions of the ligand and anion solution so that the final concentration ( $[\text{L}] + [\text{anion}]$ ) of each sample became 10 mM. Sodium salt of 3-(trimethylsilyl)propionic-2,2,3,3- $d_4$  acid (TSP) in  $\text{DMSO-}d_6$  was used as an external reference in a sealed capillary tube. The stoichiometric ratio of **L** to anion in the complex was estimated by plotting  $\Delta\delta ([\text{L}]/([\text{L}] + [\text{A}]))$  with  $([\text{L}]/([\text{L}] + [\text{A}])))$ .

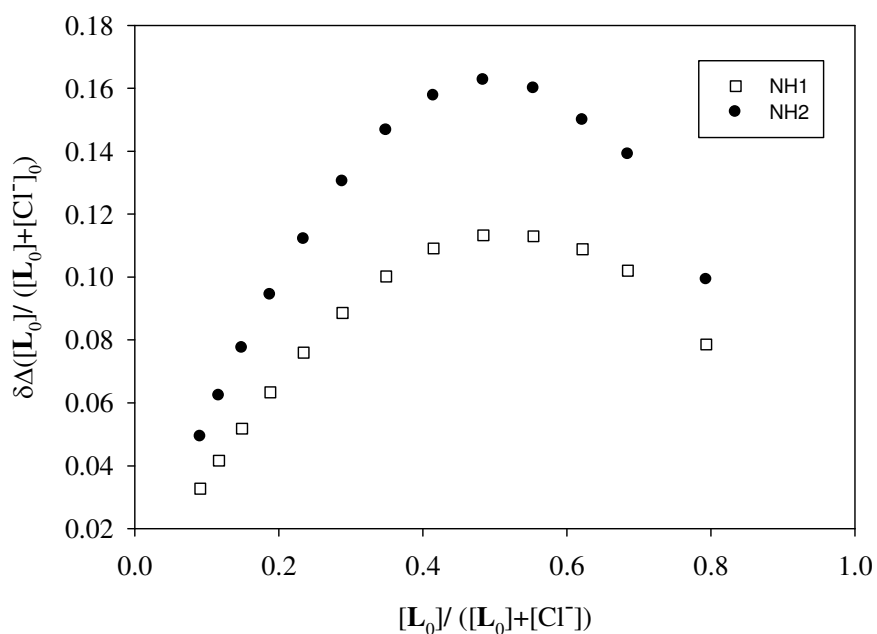

**Figure S6.** Job's plot of **L** with TBACl in DMSO-*d*<sub>6</sub> showing a maximum at 0.5 mole fraction of **L**. The shift change ( $\delta\Delta$ ) in the H1 ( $\text{CH}_2\text{NHCO}$ ) and H2 ( $\text{CONHAr}$ ) were followed for the Job's plot.

### DFT calculations

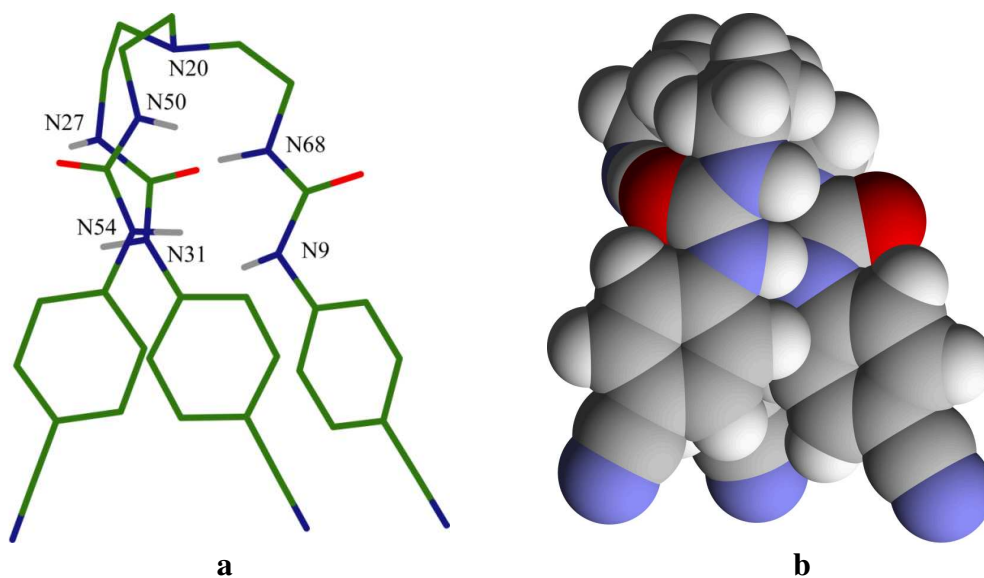

**Figure S7.** Optimized structures: (a) perspective view and (b) space filling model of **L**

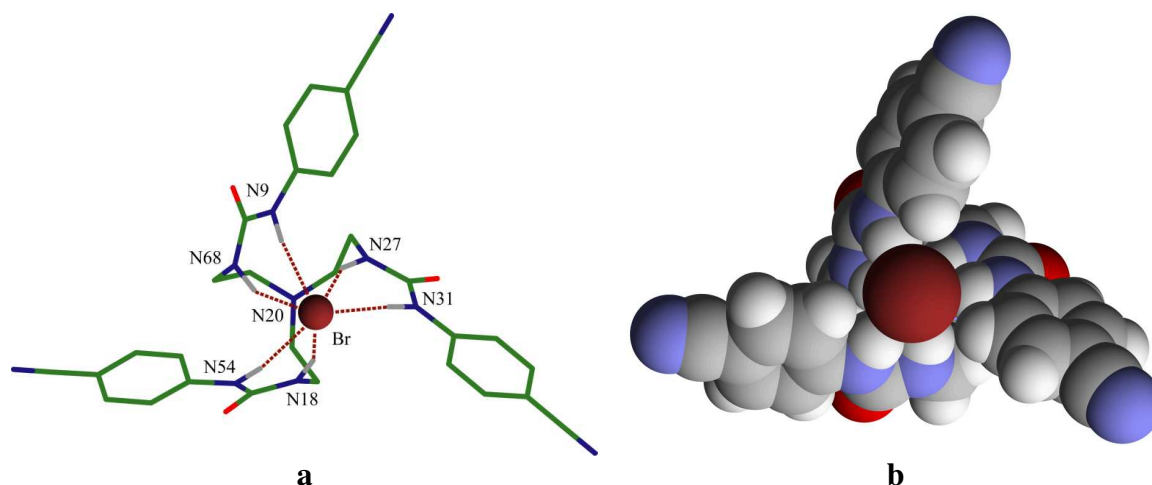

**Figure S8.** Optimized structures: (a) perspective view and (b) space filling model of bromide complex of **L**

**Table S1.** Reference Cartesian coordinates (in Å) and total energy (in Hartrees) for **L**.

Total energy: -1934.33017480

|        |         |         |        |   |
|--------|---------|---------|--------|---|
| 1 C1   | 8.4985  | 11.9640 | 0.6015 | C |
| 2 N2   | 8.7988  | 10.8461 | 0.5961 | N |
| 3 N3   | 0.0345  | 12.3391 | 2.6296 | N |
| 4 N4   | 5.2543  | 11.4578 | 6.4502 | N |
| 5 C5   | 6.7930  | 13.7247 | 0.8172 | C |
| 6 H6   | 6.0273  | 12.9642 | 0.9300 | H |
| 7 C7   | 6.4499  | 15.0634 | 0.8668 | C |
| 8 O8   | 3.4648  | 18.9734 | 3.6559 | O |
| 9 N9   | 4.7906  | 17.1804 | 3.0217 | N |
| 10 C10 | 3.7628  | 16.2136 | 2.9703 | C |
| 11 C11 | 2.4454  | 16.5339 | 2.6209 | C |
| 12 H12 | 2.1737  | 17.5623 | 2.4316 | H |
| 13 C13 | 1.4945  | 15.5262 | 2.5496 | C |
| 14 H14 | 0.4710  | 15.7689 | 2.2856 | H |
| 15 C15 | 1.8386  | 14.1959 | 2.8094 | C |
| 16 C16 | 3.1575  | 13.8754 | 3.1474 | C |
| 17 H17 | 3.4287  | 12.8466 | 3.3609 | H |
| 18 C18 | 4.1087  | 14.8798 | 3.2247 | C |
| 19 C19 | 0.8409  | 13.1648 | 2.7160 | C |
| 20 N20 | 7.8498  | 20.9025 | 3.2825 | N |
| 21 C21 | 9.2613  | 21.1862 | 3.5221 | C |
| 22 H22 | 9.4090  | 22.1905 | 3.9594 | H |
| 23 H23 | 9.7653  | 21.1883 | 2.5491 | H |
| 24 C24 | 9.9556  | 20.1469 | 4.4061 | C |
| 25 H25 | 11.0328 | 20.3399 | 4.3878 | H |
| 26 H26 | 9.6319  | 20.2055 | 5.4461 | H |

|        |         |         |           |
|--------|---------|---------|-----------|
| 27 N27 | 9.6883  | 18.7970 | 3.9506 N  |
| 28 H28 | 9.7423  | 18.6574 | 2.9446 H  |
| 29 C29 | 8.7428  | 18.0657 | 4.6101 C  |
| 30 O30 | 8.3230  | 18.3231 | 5.7256 O  |
| 31 N31 | 8.2807  | 16.9667 | 3.8659 N  |
| 32 H32 | 8.8032  | 16.7646 | 3.0187 H  |
| 33 C33 | 7.6688  | 15.8454 | 4.4596 C  |
| 34 C34 | 6.7578  | 15.9675 | 5.5203 C  |
| 35 H35 | 6.5399  | 16.9453 | 5.9278 H  |
| 36 C36 | 6.1628  | 14.8287 | 6.0459 C  |
| 37 H37 | 5.4583  | 14.9181 | 6.8655 H  |
| 38 C38 | 6.4431  | 13.5658 | 5.5134 C  |
| 39 C39 | 7.3334  | 13.4477 | 4.4400 C  |
| 40 H40 | 7.5496  | 12.4717 | 4.0171 H  |
| 41 C41 | 7.9407  | 14.5807 | 3.9220 C  |
| 42 H42 | 8.6408  | 14.4883 | 3.0971 H  |
| 43 C43 | 5.7902  | 12.3979 | 6.0394 C  |
| 44 C44 | 7.3643  | 21.6592 | 2.1340 C  |
| 45 H45 | 7.7566  | 22.6914 | 2.1251 H  |
| 46 H46 | 6.2754  | 21.7403 | 2.1941 H  |
| 47 C47 | 7.7144  | 20.9751 | 0.8137 C  |
| 48 H48 | 7.3931  | 21.6031 | -0.0231 H |
| 49 H49 | 8.7902  | 20.8189 | 0.7141 H  |
| 50 N50 | 7.0924  | 19.6717 | 0.6874 N  |
| 51 H51 | 6.1130  | 19.6256 | 0.4498 H  |
| 52 C52 | 7.7798  | 18.5202 | 0.8943 C  |
| 53 O53 | 8.9902  | 18.4806 | 1.1111 O  |
| 54 N54 | 6.9899  | 17.3849 | 0.8161 N  |
| 55 H55 | 5.9949  | 17.4975 | 0.9764 H  |
| 56 C56 | 7.4297  | 16.0608 | 0.7497 C  |
| 57 C57 | 8.7676  | 15.6910 | 0.5356 C  |
| 58 H58 | 9.5259  | 16.4509 | 0.4112 H  |
| 59 C59 | 9.1030  | 14.3444 | 0.4721 C  |
| 60 H60 | 10.1353 | 14.0566 | 0.3039 H  |
| 61 C61 | 8.1289  | 13.3527 | 0.6269 C  |
| 62 C62 | 7.0282  | 21.0930 | 4.4787 C  |
| 63 H63 | 6.9376  | 22.1582 | 4.7552 H  |
| 64 H64 | 7.5162  | 20.5688 | 5.3045 H  |
| 65 C65 | 5.6293  | 20.5070 | 4.3158 C  |
| 66 H66 | 5.1245  | 20.5195 | 5.2870 H  |
| 67 H67 | 5.0016  | 21.1013 | 3.6413 H  |
| 68 N68 | 5.7181  | 19.1423 | 3.8307 N  |
| 69 H69 | 6.6192  | 18.8244 | 3.4930 H  |
| 70 C70 | 4.5702  | 18.4821 | 3.5222 C  |
| 71 H71 | 5.6855  | 16.7902 | 3.3074 H  |
| 72 H72 | 5.1356  | 14.6350 | 3.4813 H  |
| 73 H73 | 5.4094  | 15.3447 | 0.9995 H  |

**Table S2.** Reference Cartesian coordinates (in Å) and total energy (in Hartrees) for the fluoride complex of L.

Total energy: -2034.36081621

|        |        |         |         |   |
|--------|--------|---------|---------|---|
| 1 C1   | 7.0364 | 14.7731 | -4.5160 | C |
| 2 N2   | 6.6806 | 14.3072 | -5.5157 | N |
| 3 N3   | 1.0155 | 15.0050 | 8.1314  | N |
| 4 N4   | 7.4086 | 10.6746 | 8.8967  | N |
| 5 C5   | 6.9901 | 14.8749 | -2.0566 | C |
| 6 H6   | 6.2633 | 14.0697 | -2.0453 | H |
| 7 C7   | 7.4238 | 15.4382 | -0.8725 | C |
| 8 O8   | 3.7453 | 18.7673 | 2.0096  | O |
| 9 N9   | 4.8234 | 16.8925 | 2.8422  | N |
| 10 C10 | 3.9867 | 16.5436 | 3.8930  | C |
| 11 C11 | 2.8012 | 17.2251 | 4.2180  | C |
| 12 H12 | 2.4900 | 18.0652 | 3.6156  | H |
| 13 C13 | 2.0519 | 16.8143 | 5.3090  | C |
| 14 H14 | 1.1403 | 17.3456 | 5.5621  | H |
| 15 C15 | 2.4521 | 15.7296 | 6.0964  | C |
| 16 C16 | 3.6264 | 15.0407 | 5.7663  | C |
| 17 H17 | 3.9529 | 14.1993 | 6.3689  | H |
| 18 C18 | 4.3716 | 15.4377 | 4.6729  | C |
| 19 C19 | 1.6613 | 15.3270 | 7.2247  | C |
| 20 N20 | 7.2946 | 20.4043 | 2.5361  | N |
| 21 C21 | 7.0607 | 20.8703 | 3.8977  | C |
| 22 H22 | 6.5909 | 21.8701 | 3.9176  | H |
| 23 H23 | 8.0296 | 20.9533 | 4.4019  | H |
| 24 C24 | 6.2110 | 19.8729 | 4.6810  | C |
| 25 H25 | 6.1064 | 20.1823 | 5.7234  | H |
| 26 H26 | 5.1998 | 19.8039 | 4.2508  | H |
| 27 N27 | 6.8610 | 18.5827 | 4.6649  | N |
| 28 H28 | 7.0454 | 18.1778 | 3.7524  | H |
| 29 C29 | 6.7955 | 17.7329 | 5.7335  | C |
| 30 O30 | 6.3831 | 18.0484 | 6.8396  | O |
| 31 N31 | 7.3047 | 16.4792 | 5.4051  | N |
| 32 H32 | 7.5617 | 16.3585 | 4.4156  | H |
| 33 C33 | 7.2985 | 15.3428 | 6.1839  | C |
| 34 C34 | 6.8957 | 15.2994 | 7.5317  | C |
| 35 H35 | 6.5642 | 16.2092 | 8.0115  | H |
| 36 C36 | 6.9220 | 14.0936 | 8.2141  | C |
| 37 H37 | 6.6106 | 14.0600 | 9.2531  | H |
| 38 C38 | 7.3416 | 12.9130 | 7.5882  | C |
| 39 C39 | 7.7354 | 12.9546 | 6.2437  | C |
| 40 H40 | 8.0561 | 12.0438 | 5.7489  | H |
| 41 C41 | 7.7123 | 14.1509 | 5.5546  | C |
| 42 H42 | 8.0071 | 14.1935 | 4.5090  | H |
| 43 C43 | 7.3746 | 11.6754 | 8.3133  | C |
| 44 C44 | 8.5816 | 20.8040 | 1.9862  | C |
| 45 H45 | 8.8595 | 21.8308 | 2.2851  | H |

|        |         |         |           |
|--------|---------|---------|-----------|
| 46 H46 | 8.5194  | 20.7928 | 0.8941 H  |
| 47 C47 | 9.6965  | 19.8309 | 2.3800 C  |
| 48 H48 | 10.6386 | 20.1637 | 1.9337 H  |
| 49 H49 | 9.8242  | 19.8050 | 3.4666 H  |
| 50 N50 | 9.4208  | 18.4756 | 1.9486 N  |
| 51 H51 | 8.8651  | 17.8735 | 2.5529 H  |
| 52 C52 | 9.3447  | 18.2092 | 0.6119 C  |
| 53 O53 | 9.7444  | 18.9772 | -0.2567 O |
| 54 N54 | 8.7589  | 16.9728 | 0.3600 N  |
| 55 H55 | 8.3568  | 16.5149 | 1.1874 H  |
| 56 C56 | 8.3621  | 16.4866 | -0.8741 C |
| 57 C57 | 8.8533  | 16.9657 | -2.1009 C |
| 58 H58 | 9.5666  | 17.7768 | -2.1035 H |
| 59 C59 | 8.4085  | 16.3989 | -3.2844 C |
| 60 H60 | 8.7869  | 16.7681 | -4.2320 H |
| 61 C61 | 7.4810  | 15.3513 | -3.2798 C |
| 62 C62 | 6.1761  | 20.6447 | 1.6329 C  |
| 63 H63 | 6.2755  | 21.6074 | 1.1009 H  |
| 64 H64 | 5.2505  | 20.6881 | 2.2136 H  |
| 65 C65 | 6.0192  | 19.5027 | 0.6237 C  |
| 66 H66 | 5.1529  | 19.7017 | -0.0135 H |
| 67 H67 | 6.9026  | 19.4203 | -0.0200 H |
| 68 N68 | 5.8383  | 18.2230 | 1.2795 N  |
| 69 H69 | 6.6724  | 17.7289 | 1.5853 H  |
| 70 C70 | 4.7224  | 18.0273 | 2.0450 C  |
| 71 H71 | 5.7477  | 16.4514 | 2.8309 H  |
| 72 H72 | 5.2786  | 14.8982 | 4.4173 H  |
| 73 H73 | 7.0319  | 15.0901 | 0.0791 H  |
| 74 F74 | 7.5612  | 16.5307 | 2.7290 F  |

**Table S3.** Reference Cartesian coordinates (in Å) and total energy (in Hartrees) for the chloride complex of L.

Total energy: -2394.72975290

|        |         |         |           |
|--------|---------|---------|-----------|
| 1 C1   | 7.4777  | 14.9410 | -4.7836 C |
| 2 N2   | 7.2998  | 14.6358 | -5.8873 N |
| 3 N3   | -1.5567 | 16.1648 | 6.3522 N  |
| 4 N4   | 11.9355 | 12.5663 | 9.1007 N  |
| 5 C5   | 7.0075  | 14.6715 | -2.3828 C |
| 6 H6   | 6.2984  | 13.8852 | -2.6189 H |
| 7 C7   | 7.2255  | 15.0383 | -1.0694 C |
| 8 O8   | 3.6340  | 19.4473 | 1.7068 O  |
| 9 N9   | 3.8615  | 17.2675 | 2.4288 N  |
| 10 C10 | 2.7269  | 17.1143 | 3.2129 C  |
| 11 C11 | 1.7105  | 18.0772 | 3.3292 C  |
| 12 H12 | 1.7927  | 19.0036 | 2.7800 H  |
| 13 C13 | 0.6186  | 17.8217 | 4.1444 C  |



|        |         |         |           |
|--------|---------|---------|-----------|
| 14 H14 | -0.1673 | 18.5642 | 4.2360 H  |
| 15 C15 | 0.5091  | 16.6190 | 4.8499 C  |
| 16 C16 | 1.5244  | 15.6603 | 4.7326 C  |
| 17 H17 | 1.4498  | 14.7274 | 5.2811 H  |
| 18 C18 | 2.6184  | 15.9062 | 3.9268 C  |
| 19 C19 | -0.6330 | 16.3683 | 5.6826 C  |
| 20 N20 | 7.2809  | 19.8842 | 2.9940 N  |
| 21 C21 | 6.8579  | 20.2601 | 4.3327 C  |
| 22 H22 | 6.5592  | 21.3216 | 4.3926 H  |
| 23 H23 | 7.6941  | 20.1211 | 5.0245 H  |
| 24 C24 | 5.7112  | 19.3773 | 4.8305 C  |
| 25 H25 | 5.4112  | 19.7011 | 5.8314 H  |
| 26 H26 | 4.8392  | 19.4567 | 4.1721 H  |
| 27 N27 | 6.0908  | 17.9780 | 4.8933 N  |
| 28 H28 | 5.9217  | 17.3944 | 4.0826 H  |
| 29 C29 | 7.0282  | 17.5868 | 5.8037 C  |
| 30 O30 | 7.4478  | 18.3265 | 6.6865 O  |
| 31 N31 | 7.4528  | 16.2773 | 5.6209 N  |
| 32 H32 | 7.0297  | 15.7633 | 4.8473 H  |
| 33 C33 | 8.3852  | 15.5794 | 6.3735 C  |
| 34 C34 | 8.9991  | 16.0842 | 7.5325 C  |
| 35 H35 | 8.7494  | 17.0777 | 7.8741 H  |
| 36 C36 | 9.9111  | 15.2995 | 8.2202 C  |
| 37 H37 | 10.3817 | 15.6876 | 9.1176 H  |
| 38 C38 | 10.2330 | 14.0113 | 7.7805 C  |
| 39 C39 | 9.6232  | 13.5106 | 6.6226 C  |
| 40 H40 | 9.8703  | 12.5140 | 6.2729 H  |
| 41 C41 | 8.7134  | 14.2849 | 5.9290 C  |
| 42 H42 | 8.2426  | 13.9047 | 5.0262 H  |
| 43 C43 | 11.1757 | 13.2113 | 8.5095 C  |
| 44 C44 | 8.7176  | 19.9300 | 2.7827 C  |
| 45 H45 | 9.1898  | 20.7791 | 3.3075 H  |
| 46 H46 | 8.9185  | 20.0588 | 1.7157 H  |
| 47 C47 | 9.3946  | 18.6283 | 3.2192 C  |
| 48 H48 | 10.4717 | 18.7015 | 3.0383 H  |
| 49 H49 | 9.2414  | 18.4505 | 4.2893 H  |
| 50 N50 | 8.8734  | 17.4733 | 2.5118 N  |
| 51 H51 | 8.1378  | 16.9319 | 2.9512 H  |
| 52 C52 | 9.0309  | 17.3853 | 1.1602 C  |
| 53 O53 | 9.7427  | 18.1492 | 0.5170 O  |
| 54 N54 | 8.2966  | 16.3511 | 0.5958 N  |
| 55 H55 | 7.7517  | 15.7757 | 1.2392 H  |
| 56 C56 | 8.1422  | 16.0577 | -0.7508 C |
| 57 C57 | 8.8348  | 16.7084 | -1.7858 C |
| 58 H58 | 9.5390  | 17.4902 | -1.5425 H |
| 59 C59 | 8.6061  | 16.3345 | -3.1009 C |
| 60 H60 | 9.1406  | 16.8357 | -3.9012 H |
| 61 C61 | 7.6988  | 15.3180 | -3.4163 C |
| 62 C62 | 6.4979  | 20.4816 | 1.9255 C  |
| 63 H63 | 6.9771  | 21.3868 | 1.5128 H  |

|         |        |         |           |
|---------|--------|---------|-----------|
| 64 H64  | 5.5245 | 20.7839 | 2.3214 H  |
| 65 C65  | 6.2398 | 19.4839 | 0.7924 C  |
| 66 H66  | 5.6366 | 19.9625 | 0.0151 H  |
| 67 H67  | 7.1823 | 19.1581 | 0.3383 H  |
| 68 N68  | 5.5486 | 18.2931 | 1.2567 N  |
| 69 H69  | 6.1208 | 17.5166 | 1.5683 H  |
| 70 C70  | 4.2964 | 18.4191 | 1.7884 C  |
| 71 H71  | 4.4976 | 16.4695 | 2.4169 H  |
| 72 H72  | 3.4164 | 15.1732 | 3.8414 H  |
| 73 H73  | 6.6851 | 14.5480 | -0.2640 H |
| 74 Cl74 | 6.2879 | 15.1863 | 2.8146 Cl |

**Table S4.** Reference Cartesian coordinates (in Å) and total energy (in Hartrees) for the bromide complex of **L**.

Total energy: -4508.70325449

|        |         |         |           |
|--------|---------|---------|-----------|
| 1 C1   | 6.9063  | 14.7399 | -4.1977 C |
| 2 N2   | 6.6275  | 14.4377 | -5.2811 N |
| 3 N3   | -2.6720 | 16.2071 | 4.5054 N  |
| 4 N4   | 13.3137 | 12.9900 | 7.6364 N  |
| 5 C5   | 6.5078  | 14.6469 | -1.7700 C |
| 6 H6   | 5.6500  | 14.0062 | -1.9445 H |
| 7 C7   | 6.8547  | 15.0104 | -0.4836 C |
| 8 O8   | 3.6128  | 19.4439 | 1.4213 O  |
| 9 N9   | 3.6406  | 17.3135 | 2.3102 N  |
| 10 C10 | 2.3323  | 17.1599 | 2.7359 C  |
| 11 C11 | 1.2940  | 18.0540 | 2.4266 C  |
| 12 H12 | 1.5109  | 18.9298 | 1.8322 H  |
| 13 C13 | 0.0136  | 17.7972 | 2.8902 C  |
| 14 H14 | -0.7918 | 18.4844 | 2.6522 H  |
| 15 C15 | -0.2623 | 16.6606 | 3.6583 C  |
| 16 C16 | 0.7760  | 15.7711 | 3.9669 C  |
| 17 H17 | 0.5691  | 14.8910 | 4.5664 H  |
| 18 C18 | 2.0566  | 16.0194 | 3.5141 C  |
| 19 C19 | -1.5954 | 16.4095 | 4.1271 C  |
| 20 N20 | 7.3604  | 19.7842 | 3.2948 N  |
| 21 C21 | 7.0284  | 20.2841 | 4.6216 C  |
| 22 H22 | 6.7380  | 21.3491 | 4.5992 H  |
| 23 H23 | 7.9087  | 20.2042 | 5.2646 H  |
| 24 C24 | 5.9134  | 19.4707 | 5.2820 C  |
| 25 H25 | 5.7016  | 19.8886 | 6.2717 H  |
| 26 H26 | 4.9940  | 19.5192 | 4.6897 H  |
| 27 N27 | 6.2559  | 18.0671 | 5.4193 N  |
| 28 H28 | 5.9359  | 17.4237 | 4.7026 H  |
| 29 C29 | 7.3386  | 17.7038 | 6.1652 C  |
| 30 O30 | 7.9538  | 18.4764 | 6.8912 O  |
| 31 N31 | 7.6701  | 16.3644 | 6.0061 N  |

|         |         |         |           |
|---------|---------|---------|-----------|
| 32 H32  | 7.0821  | 15.8308 | 5.3684 H  |
| 33 C33  | 8.8529  | 15.7394 | 6.3746 C  |
| 34 C34  | 9.7481  | 16.2532 | 7.3260 C  |
| 35 H35  | 9.5289  | 17.1977 | 7.8031 H  |
| 36 C36  | 10.8963 | 15.5393 | 7.6339 C  |
| 37 H37  | 11.5912 | 15.9302 | 8.3698 H  |
| 38 C38  | 11.1714 | 14.3151 | 7.0155 C  |
| 39 C39  | 10.2778 | 13.8083 | 6.0618 C  |
| 40 H40  | 10.4923 | 12.8656 | 5.5701 H  |
| 41 C41  | 9.1350  | 14.5148 | 5.7423 C  |
| 42 H42  | 8.4455  | 14.1499 | 4.9846 H  |
| 43 C43  | 12.3584 | 13.5831 | 7.3567 C  |
| 44 C44  | 8.7918  | 19.8009 | 3.0197 C  |
| 45 H45  | 9.2846  | 20.6844 | 3.4615 H  |
| 46 H46  | 8.9512  | 19.8515 | 1.9395 H  |
| 47 C47  | 9.4769  | 18.5273 | 3.5200 C  |
| 48 H48  | 10.5441 | 18.5738 | 3.2847 H  |
| 49 H49  | 9.3738  | 18.4261 | 4.6059 H  |
| 50 N50  | 8.9189  | 17.3330 | 2.9103 N  |
| 51 H51  | 8.1194  | 16.9052 | 3.3657 H  |
| 52 C52  | 9.0403  | 17.1672 | 1.5580 C  |
| 53 O53  | 9.7673  | 17.8614 | 0.8569 O  |
| 54 N54  | 8.2549  | 16.1327 | 1.0730 N  |
| 55 H55  | 7.6773  | 15.6488 | 1.7588 H  |
| 56 C56  | 7.9649  | 15.8434 | -0.2526 C |
| 57 C57  | 8.7155  | 16.3186 | -1.3393 C |
| 58 H58  | 9.5633  | 16.9627 | -1.1553 H |
| 59 C59  | 8.3541  | 15.9531 | -2.6267 C |
| 60 H60  | 8.9322  | 16.3145 | -3.4710 H |
| 61 C61  | 7.2580  | 15.1150 | -2.8573 C |
| 62 C62  | 6.5655  | 20.3815 | 2.2304 C  |
| 63 H63  | 7.0201  | 21.3145 | 1.8499 H  |
| 64 H64  | 5.5774  | 20.6437 | 2.6238 H  |
| 65 C65  | 6.3448  | 19.4029 | 1.0767 C  |
| 66 H66  | 5.8113  | 19.9074 | 0.2674 H  |
| 67 H67  | 7.2989  | 19.0376 | 0.6805 H  |
| 68 N68  | 5.5597  | 18.2536 | 1.4836 N  |
| 69 H69  | 6.0368  | 17.5017 | 1.9691 H  |
| 70 C70  | 4.2227  | 18.4246 | 1.7178 C  |
| 71 H71  | 4.2688  | 16.5447 | 2.5384 H  |
| 72 H72  | 2.8755  | 15.3475 | 3.7600 H  |
| 73 H73  | 6.2691  | 14.6779 | 0.3702 H  |
| 74 Br74 | 6.0198  | 15.2229 | 3.3501 Br |
